# Supplementary material
Source: PubMed Central journal article supplement (PMC7805578)
Supplement: NIHMS1622366-supplement-1622366_Blots_SourceData_ExtData_Fig5.pdf [file NIHMS1622366-supplement-1622366_Blots_SourceData_ExtData_Fig5.pdf]

Extended Data Fig. 5a

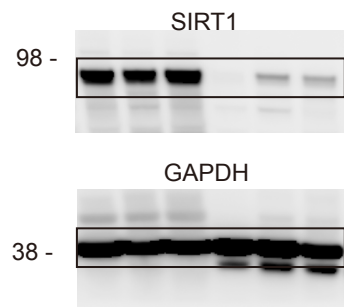

Extended Data Fig. 5c

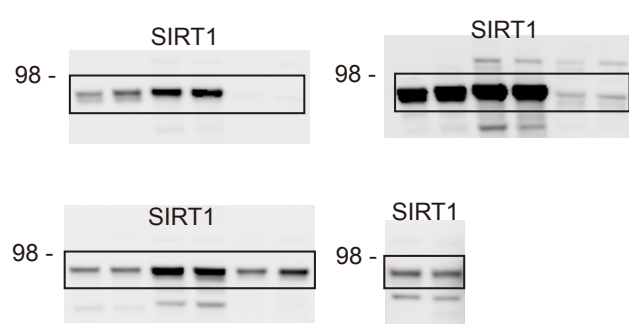

Extended Data Fig. 5d

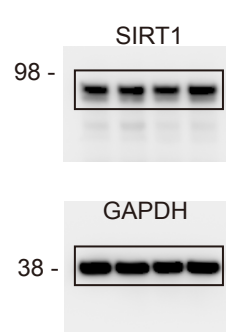

Extended Data Fig. 5e

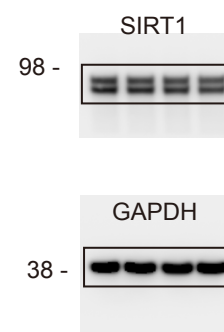

Extended Data Fig. 5f

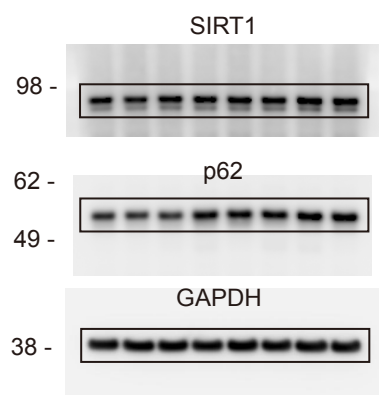

Extended Data Fig. 5g

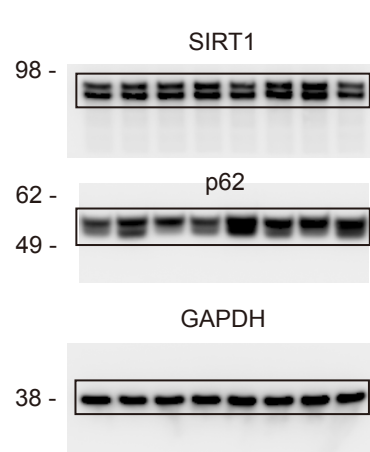

Extended Data Fig. 5i

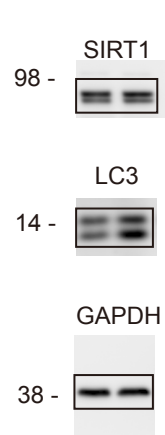

**Source Data Extended Data Figure 5. Unprocessed western blots**
