# Supplementary material
Source: PubMed Central journal article supplement (PMC7805578)
Supplement: NIHMS1622366-supplement-1622366_Supp_Fig1.pdf [file NIHMS1622366-supplement-1622366_Supp_Fig1.pdf]

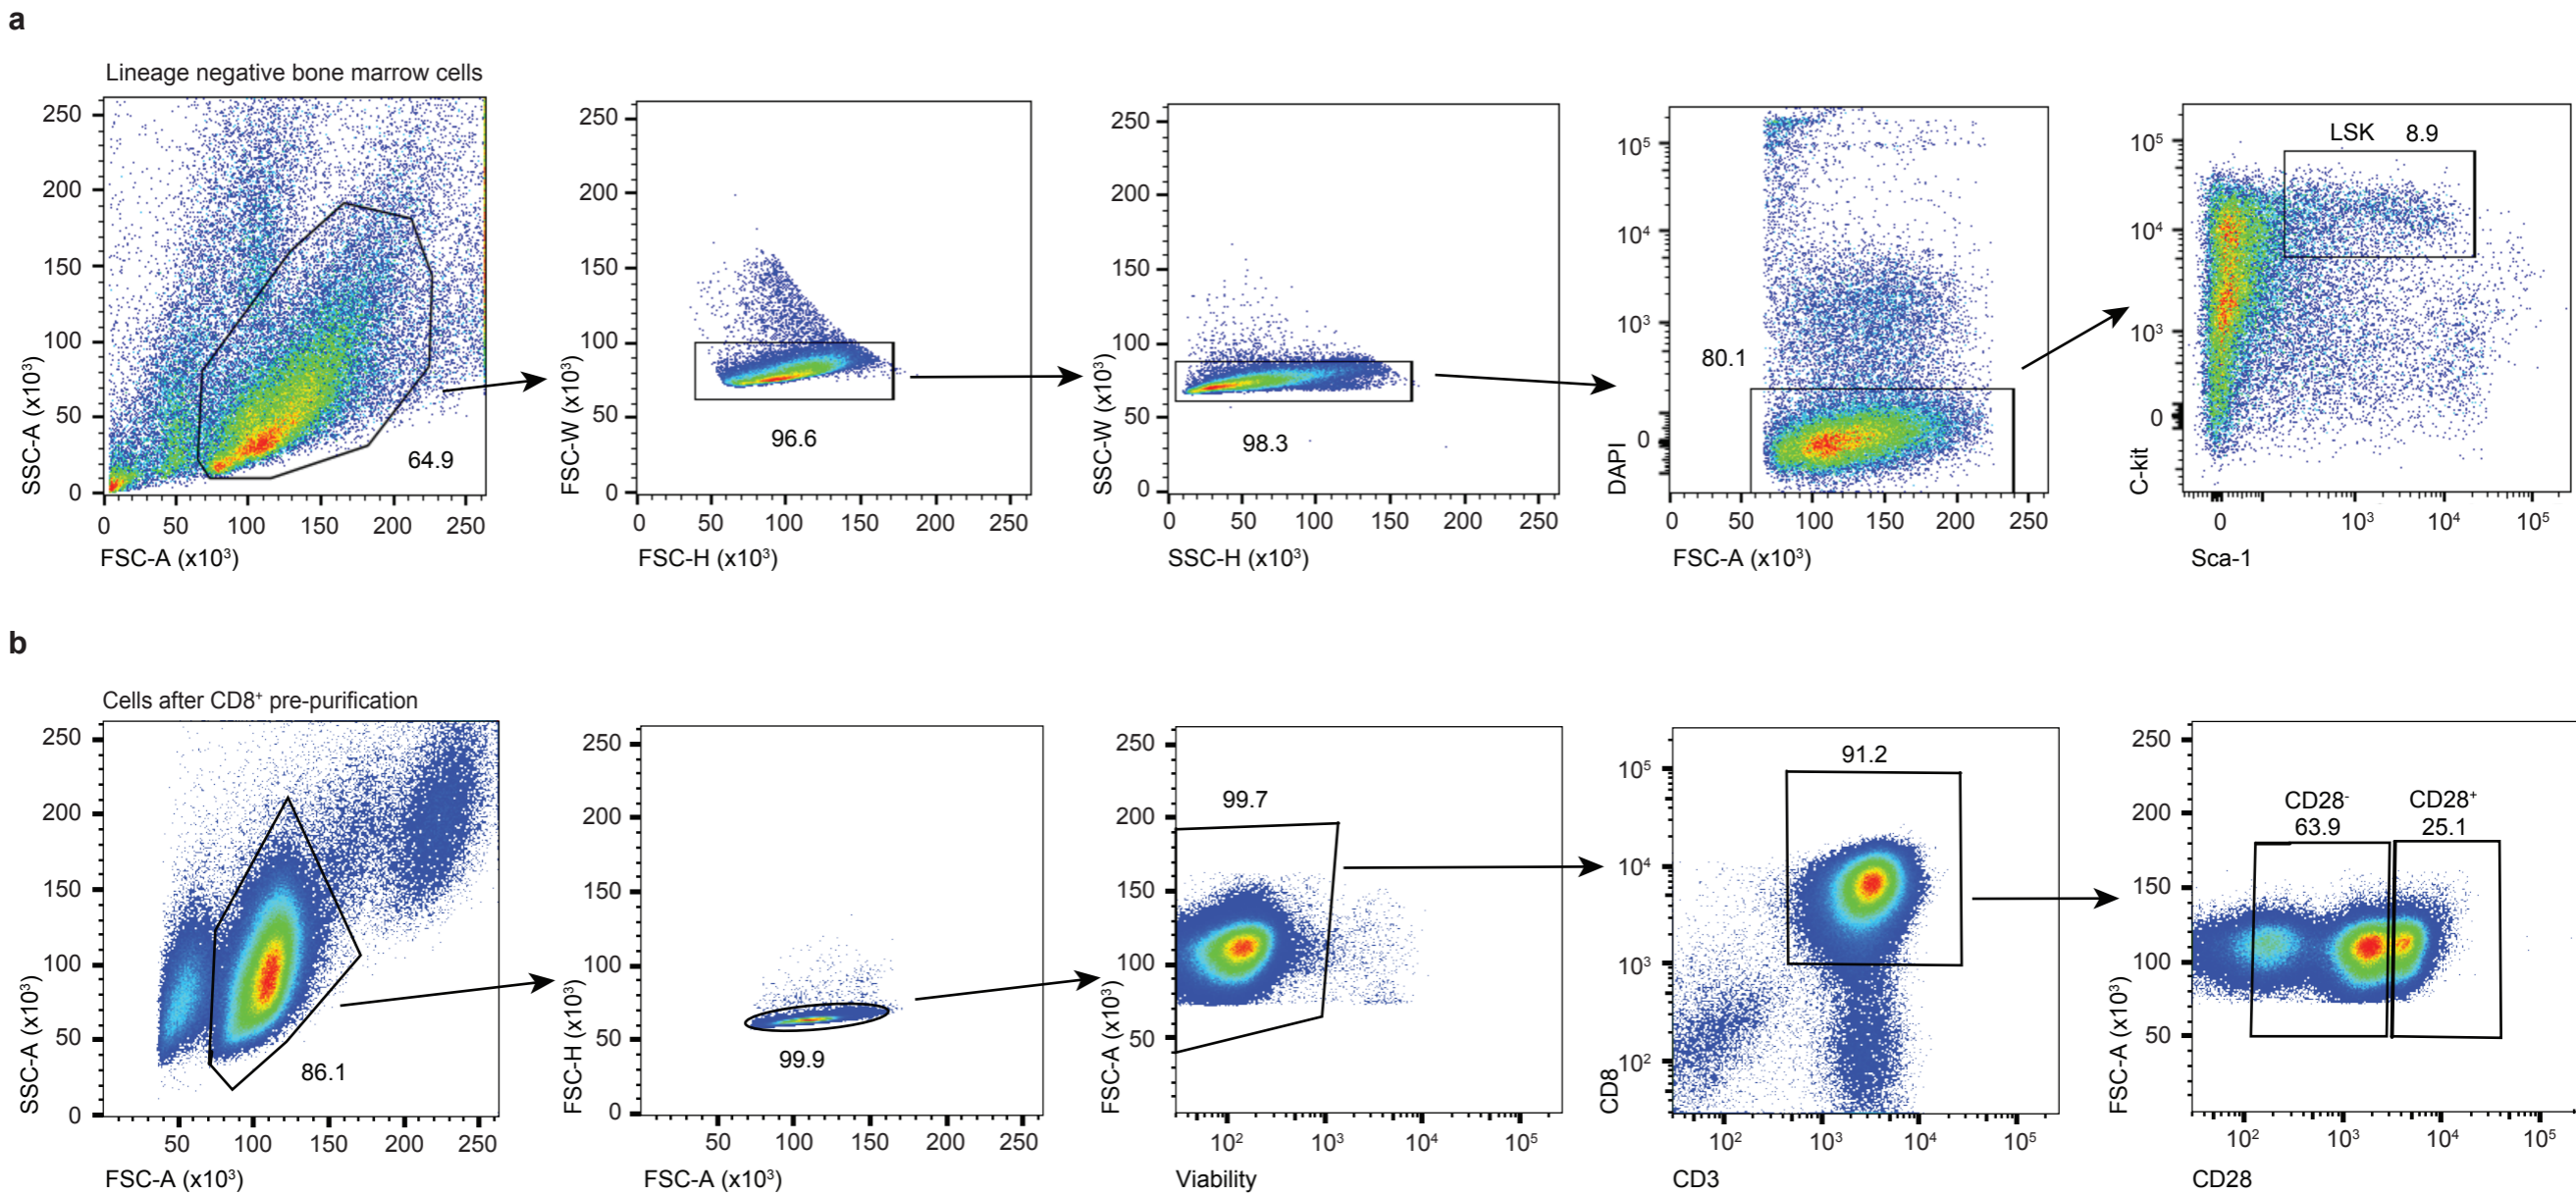

**Supplementary Figure 1. Gating strategies used for cell sorting.**

**a**, Gating strategy to isolate Lin-Sca-1<sup>+</sup>c-Kit<sup>+</sup> cells from young and aged mice presented in Fig. 5e and Extended Data Fig. 5 h-i.

**b**, Gating strategy to sort CD8<sup>+</sup>CD28<sup>-</sup> T cells from human donors presented in Fig. 5f.
