# Supplementary material
Source: PubMed Central journal article supplement (PMC7805578)

Fig. 5a

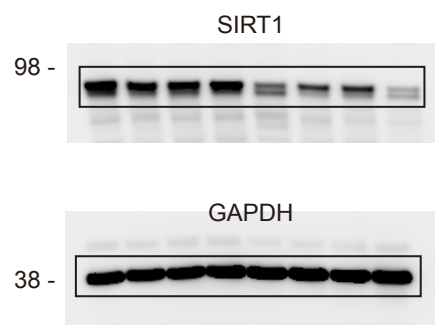

Fig. 5b

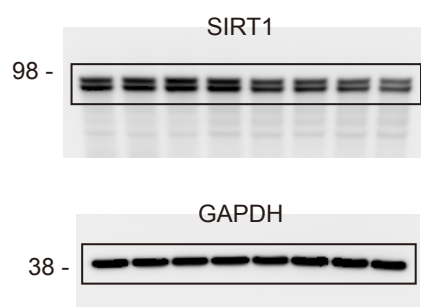

Fig. 5c

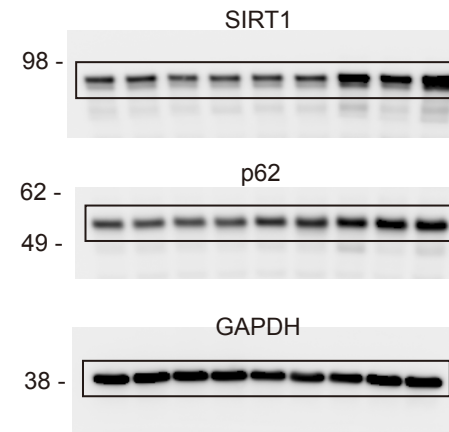

Fig. 5d

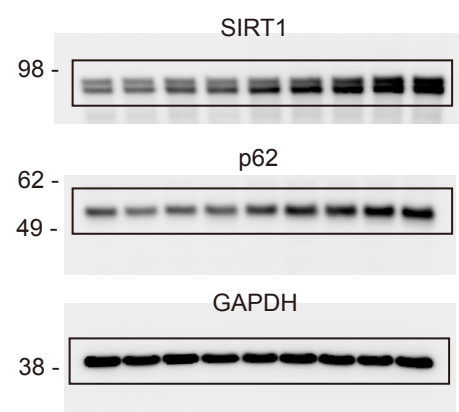

Fig. 5e

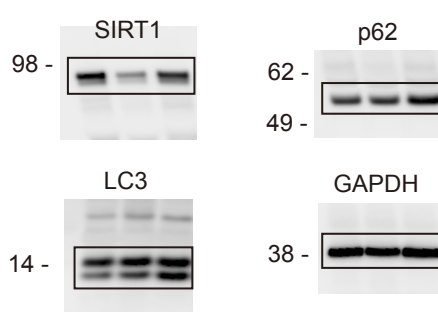

Fig. 5f

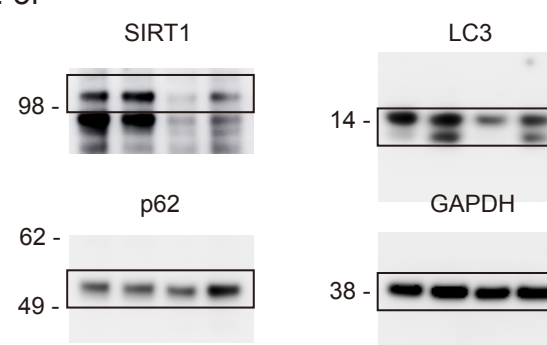

Source Data Figure 5. Unprocessed western blots

Supplement: NIHMS1622366-supplement-1622366_Blot_SourceData_Fig5.pdf [file NIHMS1622366-supplement-1622366_Blot_SourceData_Fig5.pdf]
